# Supplementary material
Source: PubMed Central journal article supplement (PMC6322430)

Terrell et al., Supplemental figure S1. Common sperm abnormalities in felids. Domestic cat spermatozoa exhibiting normal morphology (a); a bent midpiece encompassing a cytoplasmic droplet (b); an abnormal acrosome (c); a proximal cytoplasmic droplet (c) and a bent tail encircling a cytoplasmic droplet (d).

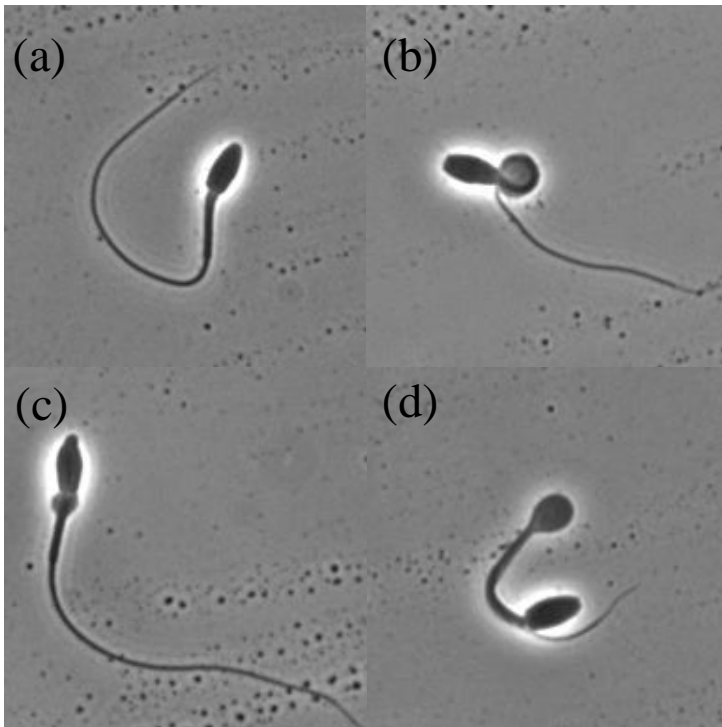

Supplement: biolreprod.110.085639-1.pdf [file biolreprod.110.085639-1.pdf]
